# Supplementary material for: Effect of diol isomer/water mixtures on the stability of Zn-MOF-74
Source: Royal Society of Chemistry journal article supplement (doi:10.1039/d0dt03787g), 2020-12-22
Supplement: d0dt03787g1.pdf [file d0dt03787g1.pdf]

## Supporting Information

# Effect of Diol Isomers/Water Mixtures on the Stability of Zn-MOF-74

*Carmen González-Galán,<sup>a</sup> Salvador R. G. Balestra,<sup>a,b\*</sup> Azahara Luna-Triguero,<sup>a,c</sup> Rafael Maria Madero-Castro,<sup>a</sup> Ana Paula Zaderenko,<sup>a</sup> and Sofia Calero<sup>a,d\*</sup>*

- a) Department of Physical, Chemical, and Natural Systems, Universidad Pablo de Olavide. Ctra. Utrera km 1. ES-41013 Seville, Spain.
- b) Instituto de Ciencia de Materiales de Madrid (ICMM), Consejo Superior de Investigaciones Científicas (CSIC), Sor Juana Inés de la Cruz 3, 28039 Madrid, Spain.
- c) Energy Technology, Department of Mechanical Engineering, Eindhoven University of Technology, P.O. Box 513, 5600 MB Eindhoven, The Netherlands
- d) Materials Simulation and Modelling, Department of Applied Physics, Eindhoven University of Technology, 5600 MB Eindhoven, The Netherlands.

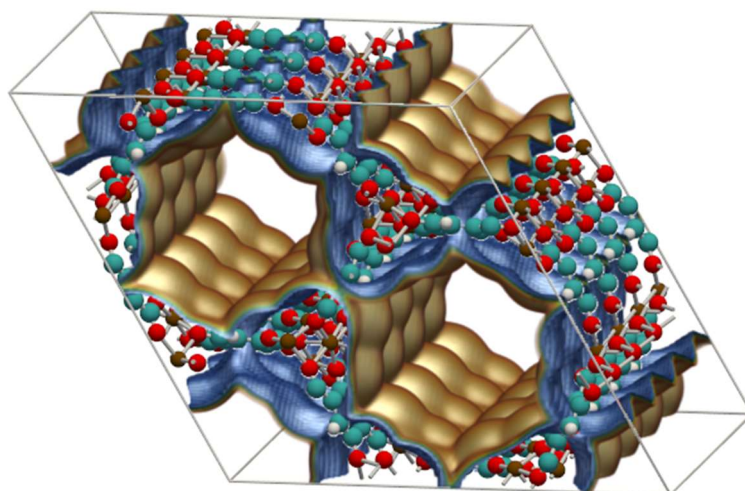

**Figure S1.** Structure of Zn-MOF-74 with the Carbon atom in blue, the Hydrogen atom in white, the Oxygen atom in red and the metallic centre (Zn) in brown.

**Code S2.** *Input used to carry out energy minimizations using LAMMPS code.*

```
#
units real
boundary p p p
atom_style full
pair_style reax/c NULL
pair_modify tail yes
box tilt large
read_data p1.data
# Pair potentials
pair_coeff * * Han.reax C C H H O Zn O O O C
# Recalculate charges
fix qeq_thermo all qeq/reax 1 0.0 10.0 1e-6 reax/c
# Minimisation Step:
minimize 1.0e-10 1.0e-10 1000 1000
unfix qeq_thermo
#
```

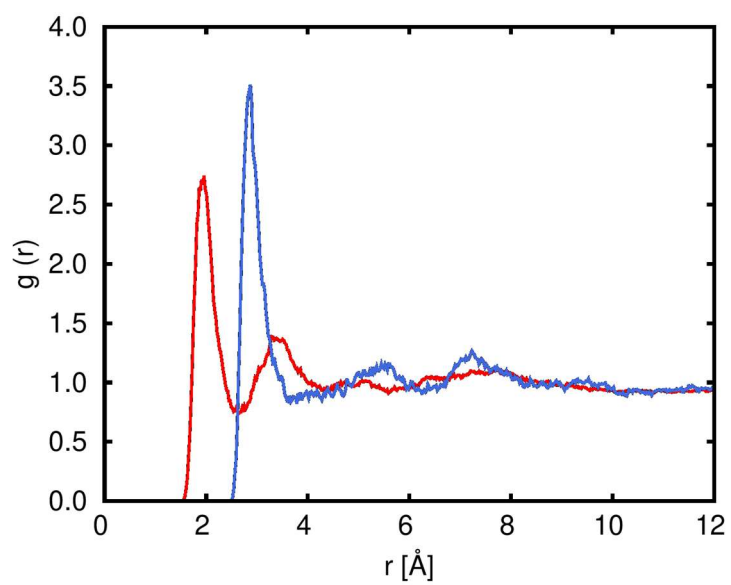

**Figure S3.** Radial distribution functions of the oxygen of the molecules (blue) and the oxygen and hydrogen of the molecules (red).

**Equation S1.** Pore condensation degree.

$$c(n_1, n_2, n_3) = \frac{3}{N\sqrt{6}} \cdot \sqrt{(\bar{n} - n_1)^2 + (\bar{n} - n_2)^2 + (\bar{n} - n_3)^2}$$

In this equation,

$c(n_1, n_2, n_3)$ : pore condensation degree

$N$ : total number of molecules

$\bar{n}$ : average number of molecules per pore

$n_i$ : number of molecules for each pore ( $i=1,2,3$ )

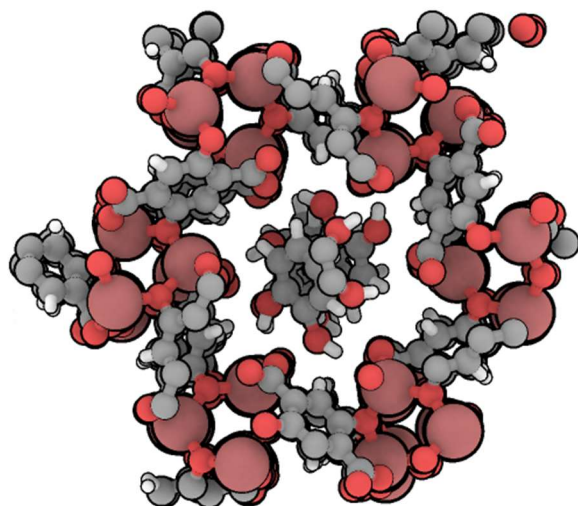

**Figure S4.** *Snapshot of the configuration of the framework with five molecules of catechol in the same pore (the same for resorcinol).*

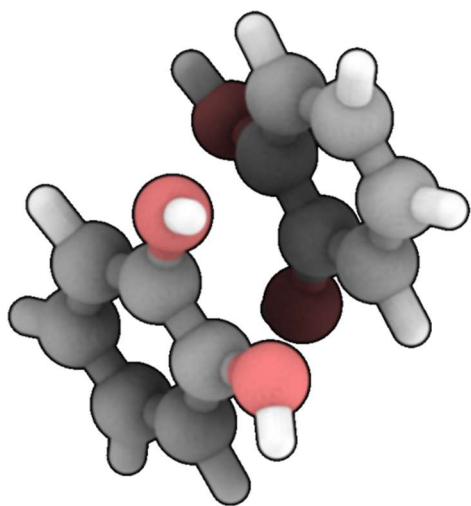

**Figure S5.** Snapshot of the  $\pi$ -stacking present for the molecules of catechol corresponding to the initial configuration  $N=5$  (all the molecules in the same pore,  $c=1$ ).

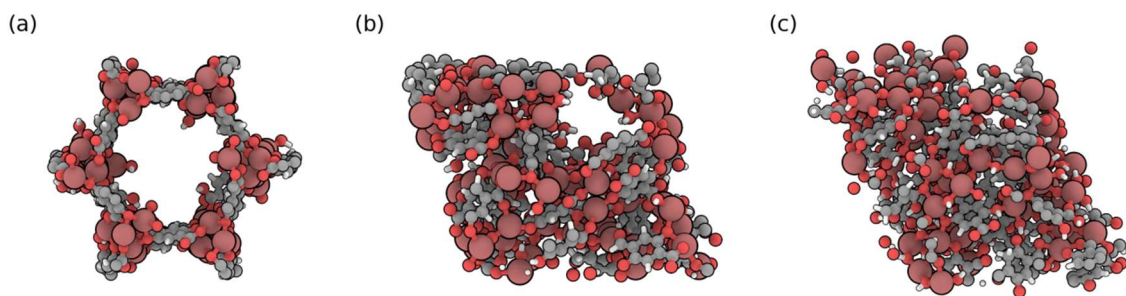

**Figure S6.** Snapshot of the configuration of Zn-MOF-74 with (a) a lower content, (b) 10.4 % and (c) a higher content of water. We have reproduced the water instability of Zn-MOF-74 using a ReaxFF. We selected three points to study the behavior of Zn-MOF-74 against water: (i) 10.4 % of water, the amount that causes the structural collapse, (ii) a lower content and (iii) a higher content of water. We obtained the same results described in previous works.<sup>37,38</sup> We reproduced the volume change until the 10.4 % of water, when the structural collapse happened.
